# Supplementary material for: Dissemination of the Flavivirus Subgenomic Replicon Genome and Viral Proteins by Extracellular Vesicles
Source: MDPI journal article supplement (doi:10.3390/v16040524), 2024-03-28
Supplement: s1 [file s1]

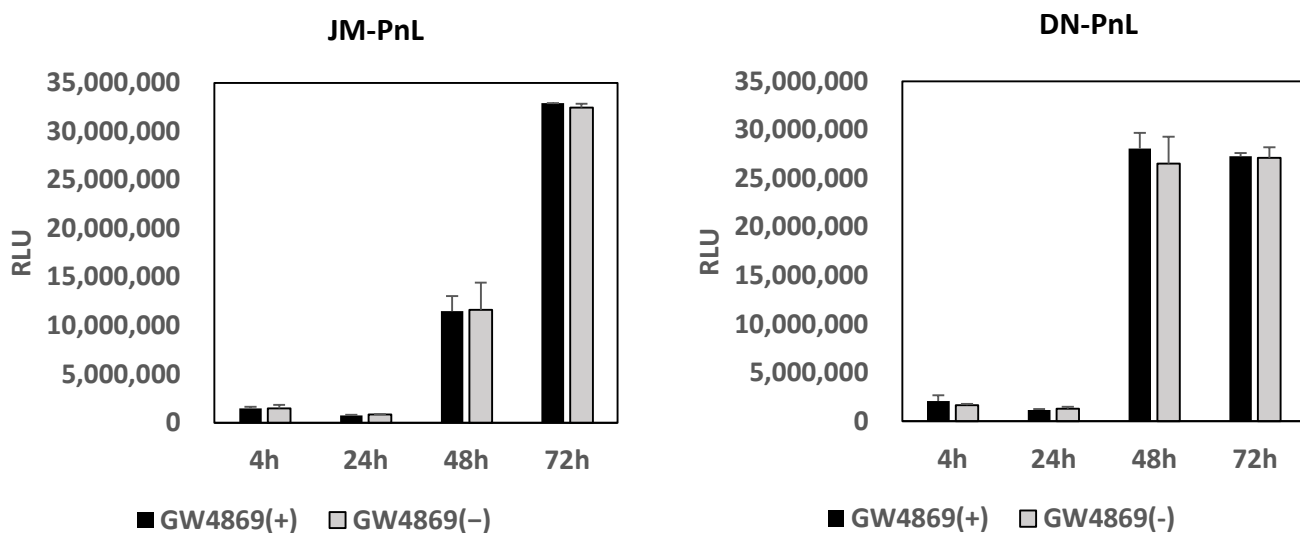

**Figure S1.** Effects of GW4869 on the replication of JM-PnL and DN-PnL in BHK cells. BHK cells electroporated with JM-PnL or DN-PnL were maintained in the presence/absence of GW4869. Cells were lysed at the indicated time points and those luciferase activities were measured (n=3). Data were expressed as relative luminescence unit to negative control.
